# Supplementary material for: Aberrant epigenome in iPSC‐derived dopaminergic neurons from Parkinson's disease patients
Source: PubMed Central journal article supplement (PMC4693505; doi:10.15252/emmm.201505439), 2015-10-29

Figure 7 and Figure EV3

Proteins upregulated in PD

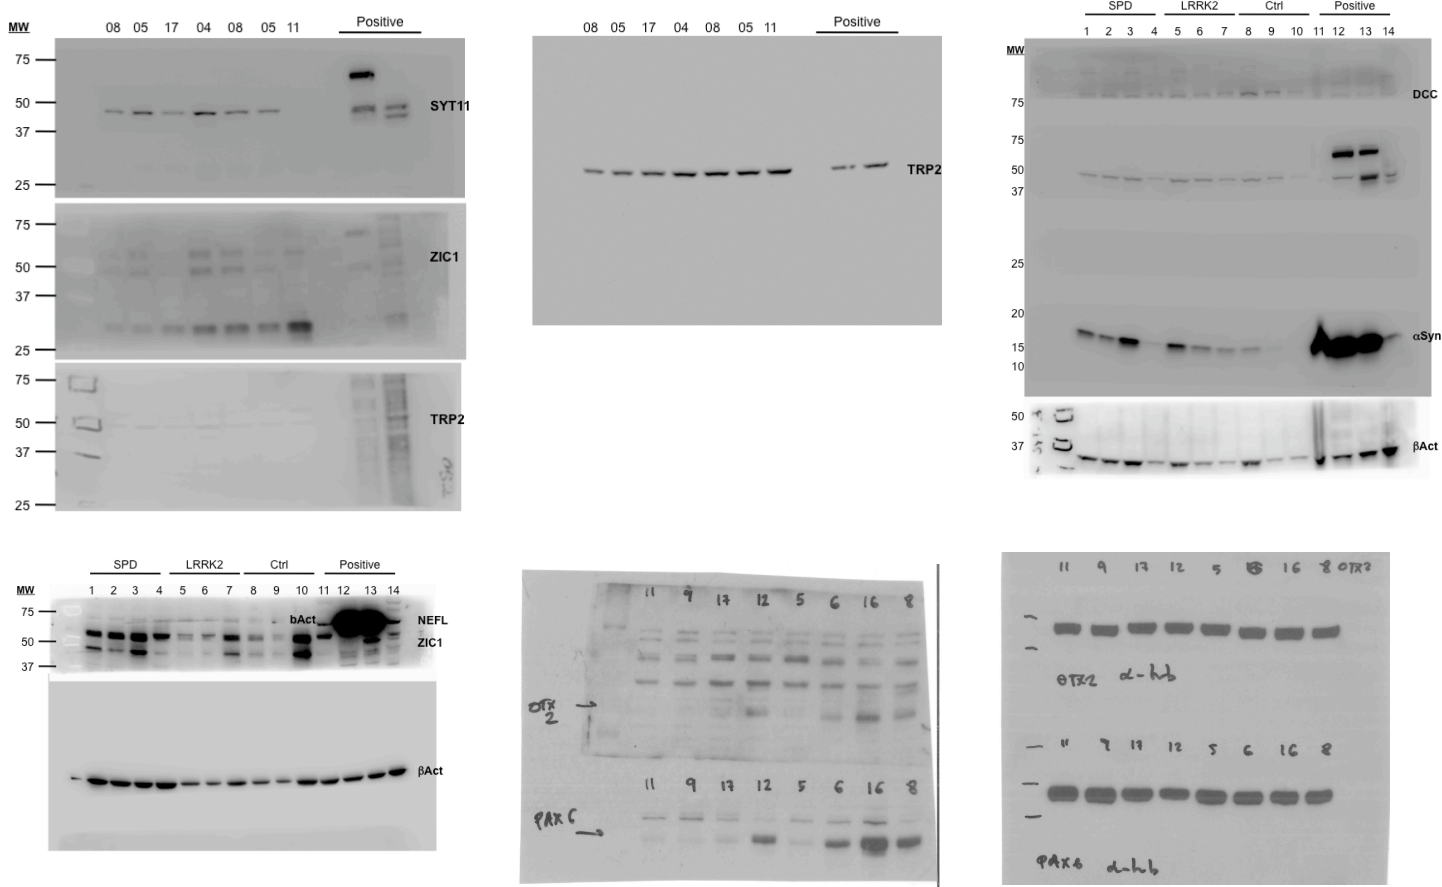

Key TFs

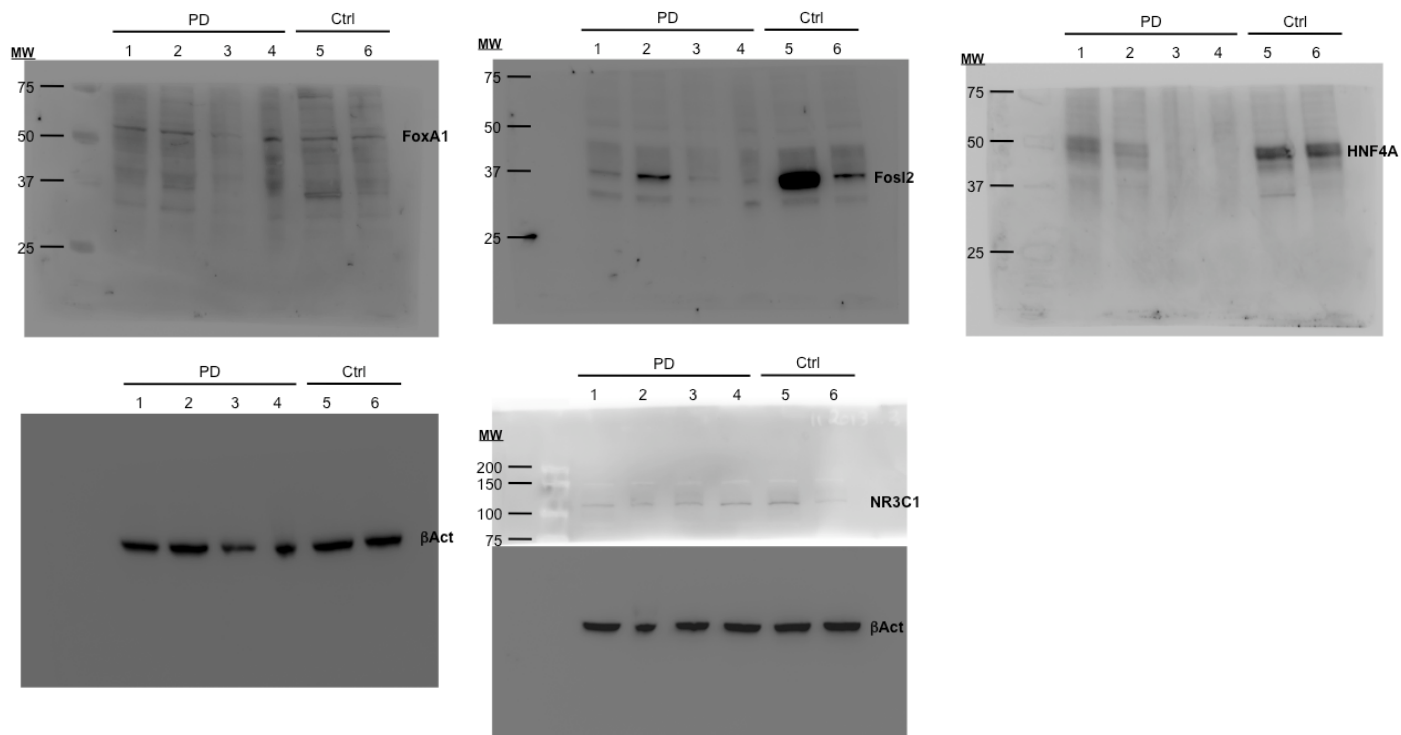

Supplement: EMMM-7-1529-s009.pdf [file EMMM-7-1529-s009.pdf]
